# Supplementary material
Source: bioRxiv or medRxiv preprint supplement (https://www.biorxiv.org/highwire/filestream/55202/field_highwire_adjunct_files/0/182725-1.pdf)
Supplement: Supplementary file [file 182725-1.pdf]

**Supplemental Table 1** Overview of primers and probes used in this study

|                   | Sequence               | Specificity RDB | Specificity within beetle symbionts                                                  | Use                  | Reference               |
|-------------------|------------------------|-----------------|--------------------------------------------------------------------------------------|----------------------|-------------------------|
| fd1 (fwd)         | AGAGTTTGATCCTGGCTCAG   | NA              | NA                                                                                   | bacterial 16S PCR    | (Weisburg et al., 1991) |
| rP2 (fwd)         | ACGGCTACCTTGTTACGACTT  | NA              | NA                                                                                   | bacterial 16S PCR    | (Weisburg et al., 1991) |
| M13_fwd           | TGTAACGACGCGCCAGT      | NA              | NA                                                                                   | cloning PCR          | StrataClone             |
| M13_rev           | GGAAACAGCTATGACCATG    | NA              | NA                                                                                   | cloning PCR          | StrataClone             |
| OsurSym_fwd2      | GGCAACTCTGAACTAGCTACGC | 0/3070243       | <i>Oryzaephilus sp.</i> symbiont                                                     | diagnostic PCR, qPCR |                         |
| OsurSym_rev2      | AGTCCCCAGCCAAACTGATG   | 40/3070243      | <i>Oryzaephilus sp.</i> symbiont                                                     | diagnostic PCR       |                         |
| RdomSym_fwd1      | TATGAACGACAGTAGATAAGC  | 0/3070243       | <i>R. dominica</i> symbiont                                                          | diagnostic PCR       |                         |
| RdomSym_rev1      | GCTTATAGTTACCTACTCGC   | 0/3070243       | <i>R. dominica</i> symbiont                                                          | diagnostic PCR       |                         |
| PtruSym_fwd1      | ACCCCCACATTGGTACTGGA   | 0/3070243       | <i>P. truncatus</i> & <i>A. advena</i> symbiont                                      | diagnostic PCR       |                         |
| PtruSym_rev1      | GCCTTCATCCTACACGCGAA   | 3/3070243       | <i>P. truncatus</i> symbiont                                                         | diagnostic PCR       |                         |
| DspSym1_fwd2      | CGTACGTAATCTACCTTTTGC  | 0/3070243       | ancestral symbiont of <i>Dinoderus sp.</i> , <i>L. brunneus</i>                      | diagnostic PCR       |                         |
| DspSym1_rev2      | CTCCGTCGAAGAATAAATT    | 0/3070243       | ancestral symbiont of <i>Dinoderus sp.</i>                                           | diagnostic PCR       |                         |
| DspSym2_fwd1      | GATAAACGCTAGCGATTAGC   | 0/3070243       | derived bostrichid clade symbionts                                                   | diagnostic PCR       |                         |
| DspSym2_rev1      | CCTTCCTCTAAACTTACGTTAG | 0/3070243       | derived symbiont of <i>Dinoderus sp.</i>                                             | diagnostic PCR       |                         |
| mod. CFB563_rev   | GACCCCTTTAAACCAAT      | NA              | all except <i>L. brunneus</i> symbionts & derived symbiont of <i>D. bifoveolatus</i> | qPCR, FISH           | (Weller et al., 2000)   |
| 28Srr             | GGGACCCGTCTTGAACAC     | NA              | NA                                                                                   | qPCR                 | (Levkanicova, 2009)     |
| Osur_28Sr         | TCTTCCTTAGTTTACGCAAGG  | NA              | NA                                                                                   | qPCR                 |                         |
| Eub338            | GCTGCCTCCCGTAGGAGT     | NA              | NA                                                                                   | FISH                 | (Amann et al., 1990)    |
| OsurSym_16S       | AGCAGCCCATGGACTAACC    | 0/3070243       | <i>Oryzaephilus sp.</i> symbiont                                                     | FISH                 |                         |
| Bostrichidae_Sym1 | TACTCGATGGCAATTAACAAC  | 0/3070243       | ancestral symbiont of <i>Dinoderus sp.</i> , <i>L. brunneus</i>                      | FISH                 |                         |
| Bostrichidae_Sym2 | CTTCCTACACGCGAAATAG    | 0/3070243       | derived bostrichid clade symbionts except <i>L. brunneus</i>                         | FISH                 |                         |

**Supplemental Table 2** Infection frequencies in Silvanid and Bostrychid grain pest beetles based on diagnostic PCR and FISH

| <b>Species</b>         | <b>N</b> | <b>Ancestral symbiont present</b> | <b>Derived symbiont present</b> | <b>Any symbiont present</b> |
|------------------------|----------|-----------------------------------|---------------------------------|-----------------------------|
| <i>A. advena</i>       | 10       | n.a.                              | 30%                             | 30%                         |
| <i>O. surinamensis</i> | 100      | n.a.                              | 99%                             | 99%                         |
| <i>O. mercator</i>     | 21       | n.a.                              | 91%                             | 91%                         |
| <i>R. dominica</i>     | 25       | n.a.                              | 76%                             | 76%                         |
| <i>P. truncatus</i>    | 21       | n.a.                              | 91%                             | 91%                         |
| <i>D. bifoveolatus</i> | 21       | 100%                              | 90%                             | 100%                        |
| <i>D. porcellus</i>    | 21       | 86%                               | 71%                             | 95%                         |
| <i>L. brunneus</i>     | 25       | 96%                               | 68%                             | 100%                        |

**Supplemental Table 3** Model parameters and results of the phylogenetic dating analyses using BEAUti and BEAST

|       | substitution model | base frequencies | clock model           | age <i>Blattabacterium</i> | age <i>Sulcia</i>    | ESS values | Log marginal likelihood using |                         | age of all endosymbionts (Mya; mean and 95% HSD) | age of male killing endosymbionts & mutualists (Mya, mean and 95% HSD) | age of <i>Blattabacteria</i> , beetle symbionts, <i>Sulcia</i> (Mya mean and 95% HSD) |
|-------|--------------------|------------------|-----------------------|----------------------------|----------------------|------------|-------------------------------|-------------------------|--------------------------------------------------|------------------------------------------------------------------------|---------------------------------------------------------------------------------------|
|       |                    |                  |                       |                            |                      |            | path sampling                 | stepping stone sampling |                                                  |                                                                        |                                                                                       |
| TE_51 | HKY                | empirical        | strict                | normal:<br>220 ± 25        | normal:<br>270 ± 3.5 | good       | -20671                        | -20670                  | 432 (392-470)                                    | 411 (377-450)                                                          | 384 (323-418)                                                                         |
| TE_52 | HKY                | estimated        | relaxed;<br>lognormal | normal:<br>220 ± 25        | normal:<br>270 ± 3.5 | good       | -20498                        | -20498                  | 503 (404-613)                                    | 462 (375-563)                                                          | 410 (341-484)                                                                         |
| TE_53 | GTR                | estimated        | relaxed;<br>lognormal | normal:<br>220 ± 25        | normal:<br>270 ± 3.5 | good       | -20387                        | -20387                  | 504 (406-606)                                    | 465 (373-554)                                                          | 413 (340-488)                                                                         |
| TE_54 | TN93               | estimated        | relaxed;<br>lognormal | normal:<br>220 ± 25        | normal:<br>270 ± 3.5 | good       | -20475                        | -20474                  | 503 (415-612)                                    | 462 (384-550)                                                          | 409 (341-483)                                                                         |
| TE_55 | HKY + G            | estimated        | relaxed;<br>lognormal | normal:<br>220 ± 25        | normal:<br>270 ± 3.5 | good       | -18728                        | -18728                  | 489 (384-607)                                    | 457 (369-568)                                                          | 404 (333-490)                                                                         |
| TE_56 | HKY +G +I          | estimated        | relaxed;<br>lognormal | normal:<br>220 ± 25        | normal:<br>270 ± 3.5 | good       | -18695                        | -18695                  | 498 (392-626)                                    | 465 (355-574)                                                          | 412 (328-505)                                                                         |
| TE_57 | GTR + G            | estimated        | relaxed;<br>lognormal | normal:<br>220 ± 25        | normal:<br>270 ± 3.5 | good       | -18721                        | -18721                  | 502 (388-627)                                    | 470 (374-586)                                                          | 414 (335-508)                                                                         |
| TE_58 | GTR +G +I          | estimated        | relaxed;<br>lognormal | normal:<br>220 ± 25        | normal:<br>270 ± 3.5 | good       | -18687                        | -18688                  | 494 (394-593)                                    | 464 (381-557)                                                          | 409 (340-488)                                                                         |
| TE_59 | TN93 +G            | estimated        | relaxed;<br>lognormal | normal:<br>220 ± 25        | normal:<br>270 ± 3.5 | good       | -18729                        | -18729                  | 498 (384-613)                                    | 463 (362-567)                                                          | 409 (334-501)                                                                         |
| TE_60 | TN93 +G +I         | estimated        | relaxed;<br>lognormal | normal:<br>220 ± 25        | normal:<br>270 ± 3.5 | good       | -18694                        | -18694                  | 494 (386-613)                                    | 460 (360-569)                                                          | 408 (328-498)                                                                         |
| TE_61 | GTR +G +I          | estimated        | strict                | normal:<br>220 ± 25        | normal:<br>270 ± 3.5 | good       | -18841                        | -18842                  | 423 (381-464)                                    | 410 (373-450)                                                          | 392 (359-432)                                                                         |
| TE_62 | GTR +G +I          | estimated        | relaxed;<br>lognormal |                            | normal:<br>270 ± 3.5 | good       | -18692                        | -18693                  | 475 (372-567)                                    | 446 (356-538)                                                          | 396 (320-473)                                                                         |
| TE_63 | GTR +G +I          | estimated        | relaxed;<br>lognormal | normal:<br>220 ± 25        |                      | good       | -18689                        | -18690                  | 593 (364-872)                                    | 557 (340-797)                                                          | 495 (310-722)                                                                         |

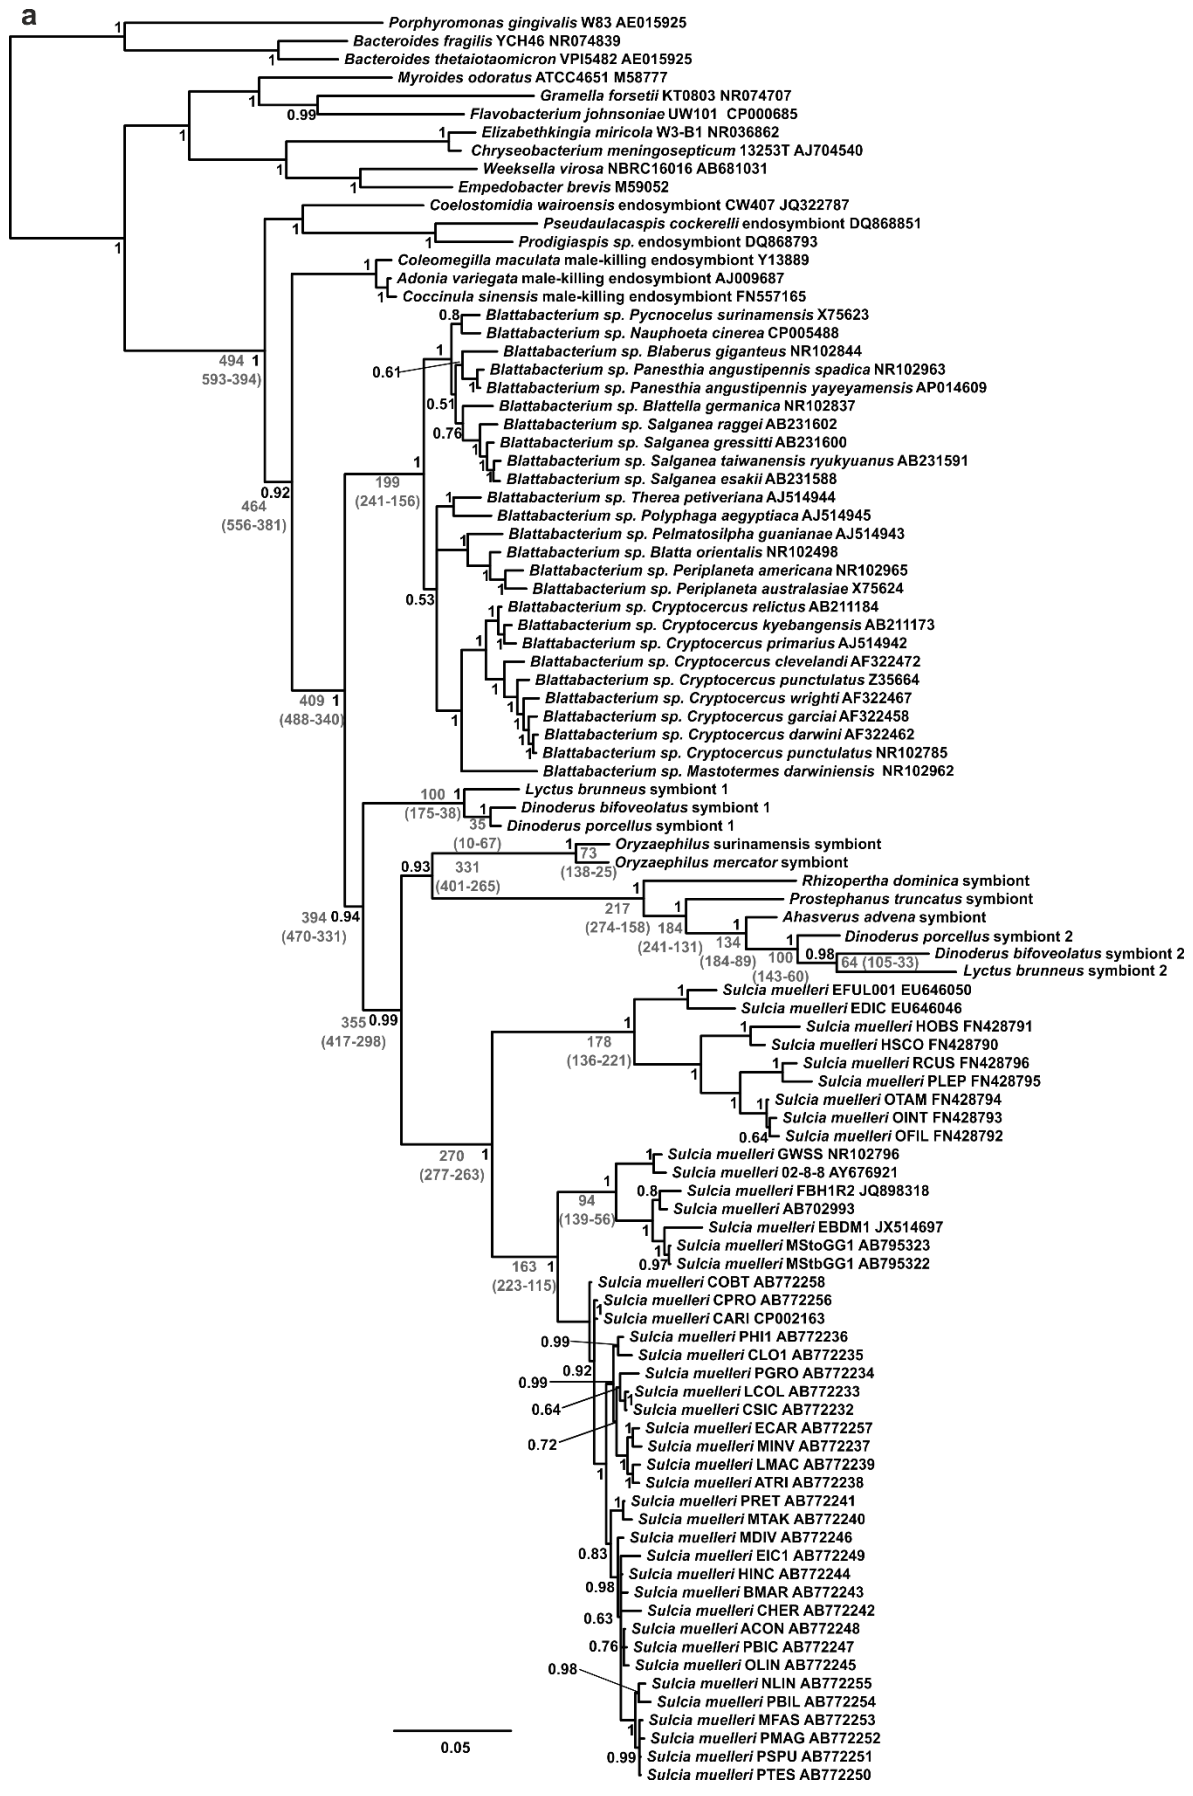

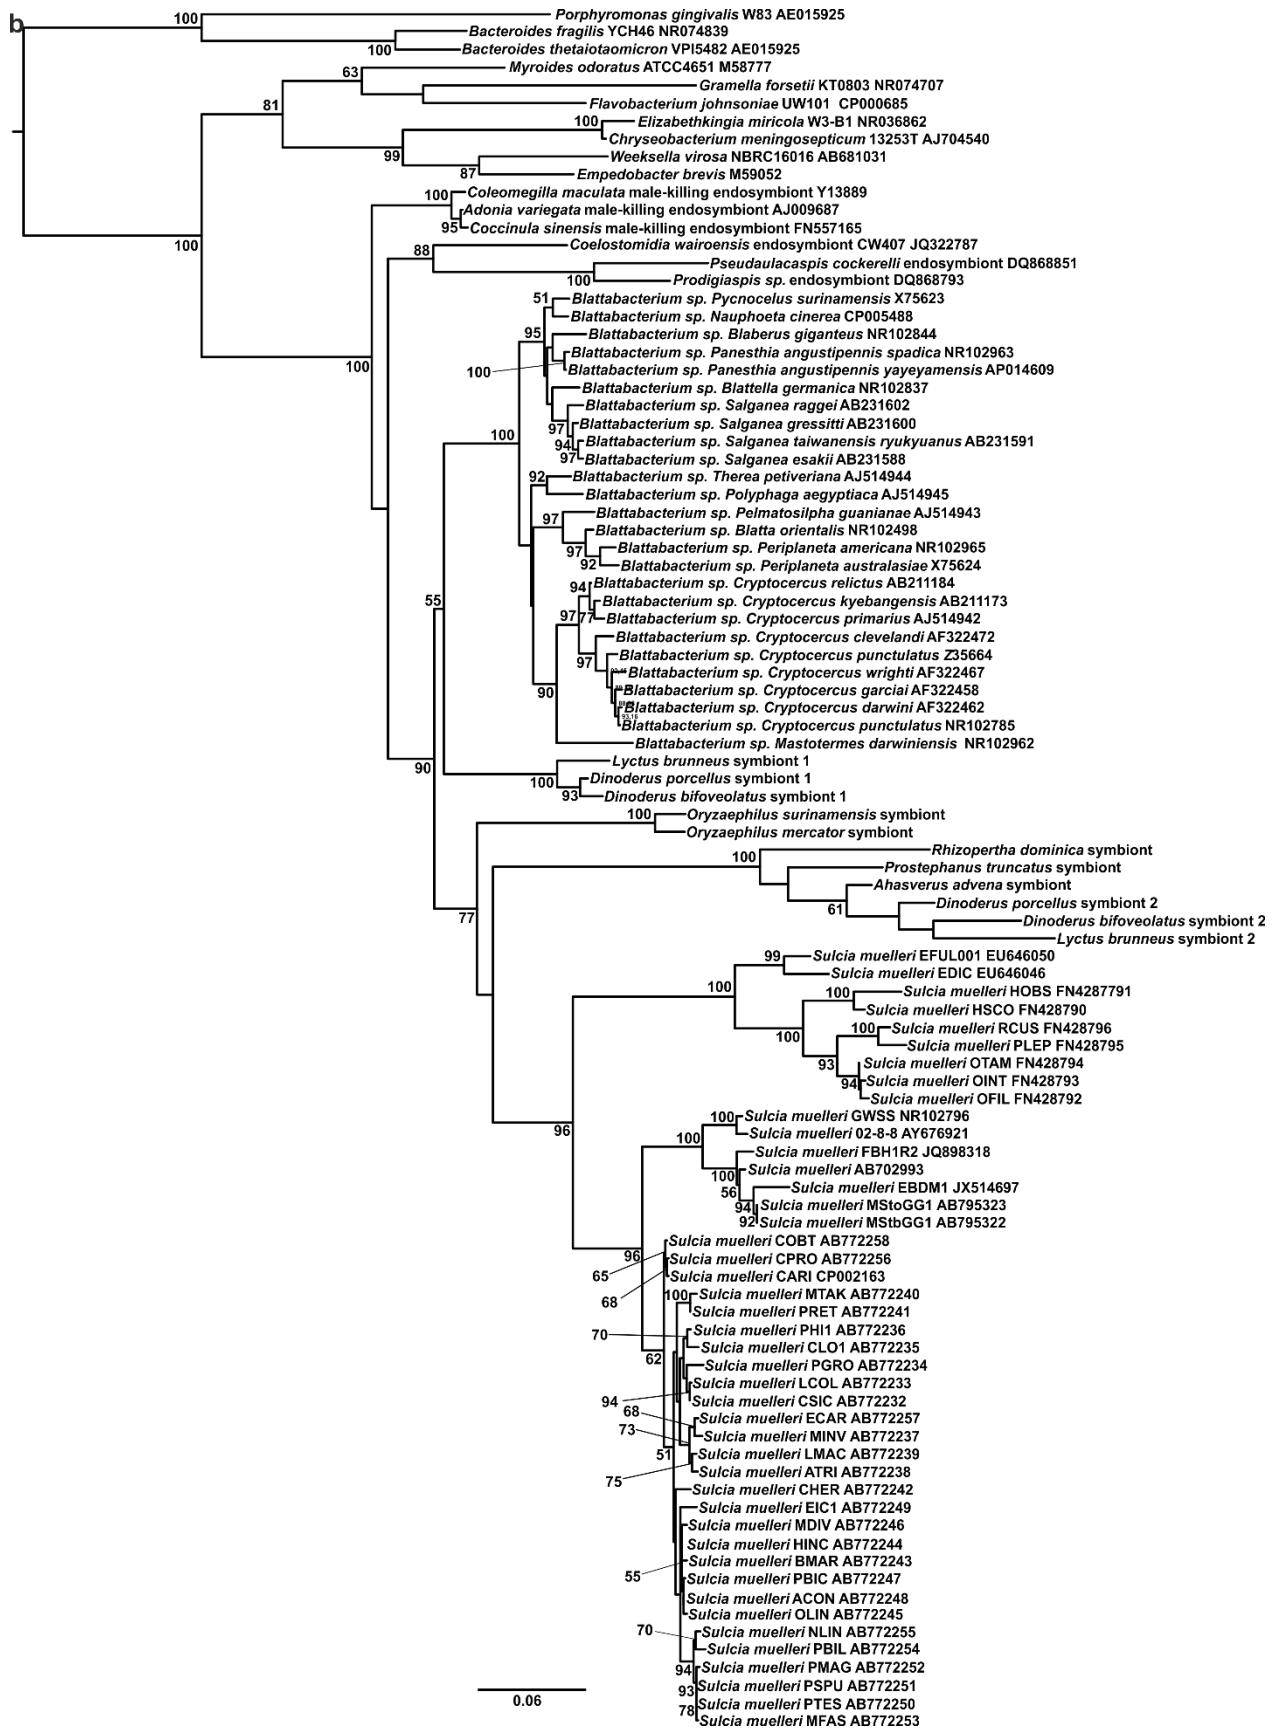

1 **Supplemental Figure 1** Detailed phylogenetic analysis of Bacteroidetes symbionts in grain pest beetles,  
2 cockroaches and cicadas with (a) Bayesian inference, (b) maximum likelihood analysis. Black node values  
3 are Bayesian posteriors and bootstrap values of 10,000 replicates, respectively. Grey values indicate  
4 mean node age and in brackets 95% HSD intervals in Mya.

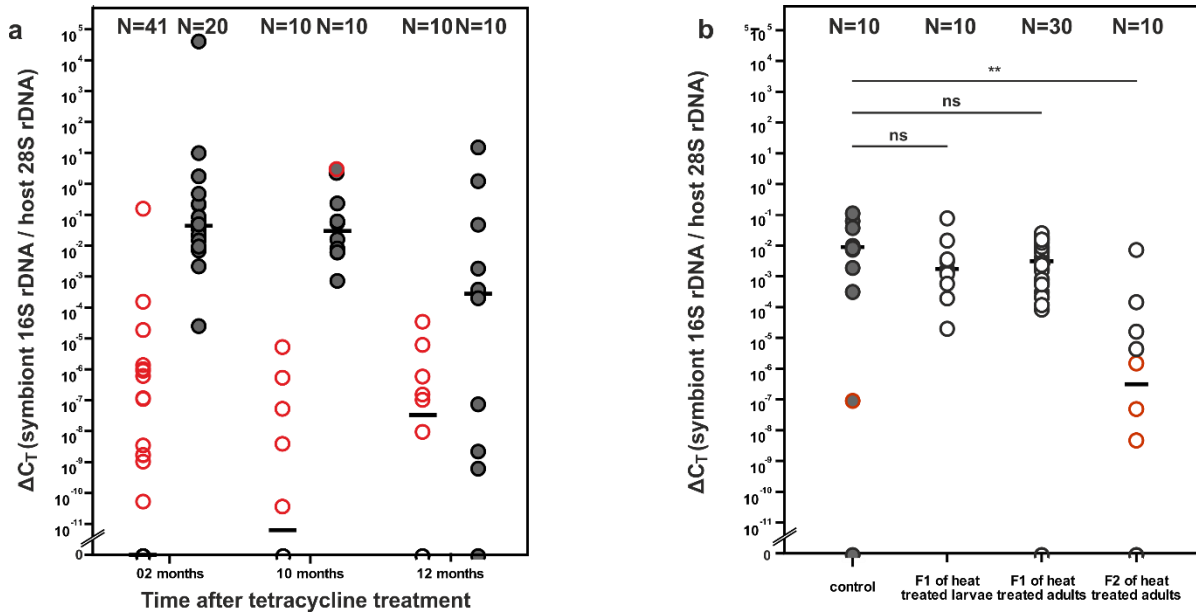

6

7 **Supplemental Figure 2** Success of symbiont elimination in *O. surinamensis*, measured as relative abundance  
 8 of symbiont 16S rDNA in eggs. (a) Tetracycline treatment could completely and stably eliminate symbionts  
 9 in the offspring of treated larvae. (b) Heat treatment slightly, but non-significantly reduced relative  
 10 symbiont abundance in the F1 offspring of treated larvae and adults (Mann-Whitney-U test,  $p > 0.05$ ), but led  
 11 to a significant reduction in the F2 offspring of treated adults (Mann-Whitney-U test,  $p = 0.003$ ). Filled circles  
 12 are symbiotic controls, empty one symbiont depletion treatments. Red circles represent off-target  
 13 amplification during late qPCR cycles, identified by melting curve analysis. Horizontal lines show medians of  
 14 each treatment including off target amplifications. Sample sizes are given within the graphs.

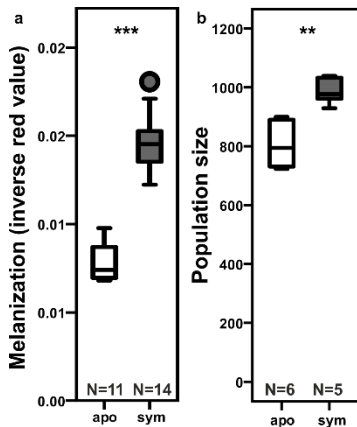

15

16 **Supplemental Figure 3** Melanization and population growth at standard culturing conditions. (a)  
 17 Melanization of two day old symbiotic and aposymbiotic *O. surinamensis* adults, and (b) growth of  
 18 populations with initially 50 symbiotic or aposymbiotic beetles over three months reared at 30°C and ~50-  
 19 60% RH. Melanization and population growth are significantly reduced in the absence of symbionts (Mann-  
 20 Whitney-U tests,  $p < 0.001$  and  $p = 0.004$ ). Boxplots show medians, quartiles, and minimum/maximum values.  
 21 Sample sizes are given underneath the boxes. Empty boxes represent aposymbiotic beetles, filled ones  
 22 symbiotic beetles.

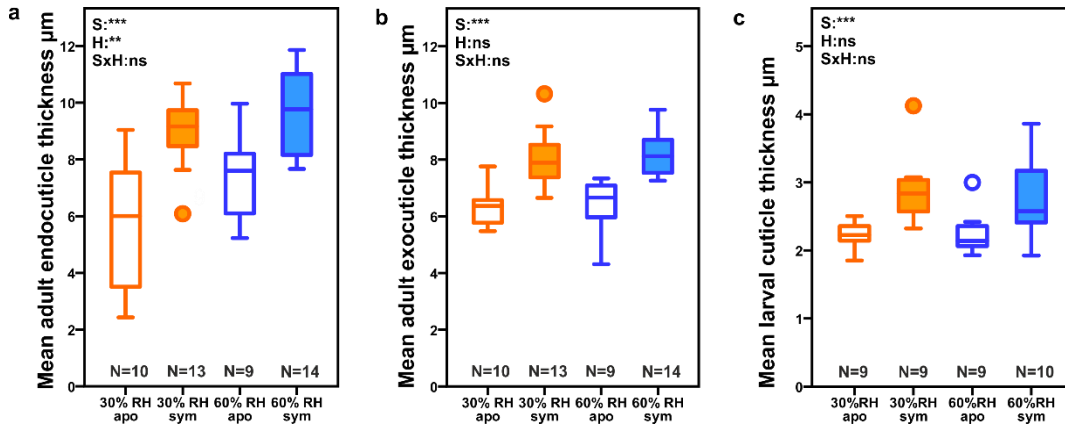

23

24 **Supplemental Figure 4** Thickness of adult endo- and exocuticle and larval cuticle. (a) Endocuticle thickness  
 25 of *O.surinamensis* adults was significantly influenced by symbiont presence (S; GLM,  $p < 0.001$ ) as well as  
 26 environmental humidity (H; GLM,  $p = 0.009$ ), whereas (b) adult exocuticle and (c) larval cuticle were only  
 27 influenced by symbiont presence (S; GLM,  $p < 0.001$ ). Boxplots show medians, quartiles, and  
 28 minimum/maximum values. Sample sizes are given under each box. Filled boxes represent symbiotic and  
 29 empty ones aposymbiotic beetles, orange boxes indicate rearing at 30% RH, blue ones at 60% RH

30

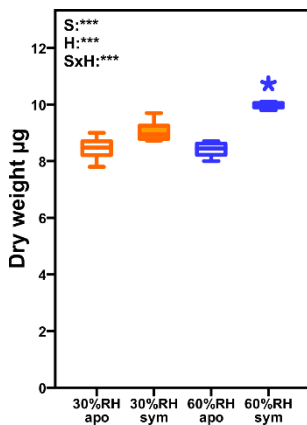

31

32 **Supplemental Figure 5** Body mass of *O.surinamensis* adults. Dry weight was significantly influenced by  
 33 symbiont presence, environmental humidity as well as their interaction (S, H, S\*H; GLM,  $p < 0.001$ ,  $N = 8$ ).  
 34 Boxplots show medians, quartiles, and minimum/maximum values. Sample sizes are given under each box.  
 35 Filled boxes represent symbiotic and empty ones aposymbiotic beetles, orange boxes indicate rearing at  
 36 30% RH, blue ones at 60% RH
